# Supplementary material for: Oral Management by a Full-Time Resident Dentist in the Hospital Ward Reduces the Incidence of Pneumonia in Patients with Acute Stroke
Source: PubMed Central journal article supplement (PMC9337935; doi:10.1155/2022/6193818), 2022-07-22
Supplement: 6193818.f1.pdf [file 6193818.f1.pdf]

Oral Assessment Sheet

ID. \_\_\_\_\_

Name. \_\_\_\_\_

Denture (maxillary): No · Yes, (mandibular): No · Yes      Oral intake: No · Yes → In the case of Yes (Denture incompatibility: No · Yes)

About Assessment

- (1) Phlegm (Yes) → dry or viscous phlegm is also evaluated
- (3) Food residue (Yes) → 5 mm or more
- (5) Difficulty in opening mouth (Yes) → 2 side fingers or less

- (2) Dryness (Yes) → Almost no saliva
- (4) Lichen on tongue (Yes) → More than 2/3 of the dorsum of tongue
- (6) Ulcers (Yes), (7) Bleeding (Yes) → Check in the following order: lip and cheek mucosa, gingiva, palate, tongue, and floor of the mouth

|                                               |                                                                                                                                                                                                                                                  |                                                                                                                                                                                                                                                  |                                                                                                                                                                                                                                                  |                                                                                                                                                                                                                                                  |                                                                                                                                                                                                                                                  |                                                                                                                                                                                                                                                  |                                                                                                                                                                                                                                                  |
|-----------------------------------------------|--------------------------------------------------------------------------------------------------------------------------------------------------------------------------------------------------------------------------------------------------|--------------------------------------------------------------------------------------------------------------------------------------------------------------------------------------------------------------------------------------------------|--------------------------------------------------------------------------------------------------------------------------------------------------------------------------------------------------------------------------------------------------|--------------------------------------------------------------------------------------------------------------------------------------------------------------------------------------------------------------------------------------------------|--------------------------------------------------------------------------------------------------------------------------------------------------------------------------------------------------------------------------------------------------|--------------------------------------------------------------------------------------------------------------------------------------------------------------------------------------------------------------------------------------------------|--------------------------------------------------------------------------------------------------------------------------------------------------------------------------------------------------------------------------------------------------|
| Month/day                                     | /                                                                                                                                                                                                                                                | /                                                                                                                                                                                                                                                | /                                                                                                                                                                                                                                                | /                                                                                                                                                                                                                                                | /                                                                                                                                                                                                                                                | /                                                                                                                                                                                                                                                | /                                                                                                                                                                                                                                                |
| (1) Phlegm                                    | No · Yes<br>dry or viscous                                                                                                                                                                                                                       | No · Yes<br>dry or viscous                                                                                                                                                                                                                       | No · Yes<br>dry or viscous                                                                                                                                                                                                                       | No · Yes<br>dry or viscous                                                                                                                                                                                                                       | No · Yes<br>dry or viscous                                                                                                                                                                                                                       | No · Yes<br>dry or viscous                                                                                                                                                                                                                       | No · Yes<br>dry or viscous                                                                                                                                                                                                                       |
| (2) Dryness                                   | No · Yes                                                                                                                                                                                                                                         | No · Yes                                                                                                                                                                                                                                         | No · Yes                                                                                                                                                                                                                                         | No · Yes                                                                                                                                                                                                                                         | No · Yes                                                                                                                                                                                                                                         | No · Yes                                                                                                                                                                                                                                         | No · Yes                                                                                                                                                                                                                                         |
| (3) Food residue                              | No · Yes                                                                                                                                                                                                                                         | No · Yes                                                                                                                                                                                                                                         | No · Yes                                                                                                                                                                                                                                         | No · Yes                                                                                                                                                                                                                                         | No · Yes                                                                                                                                                                                                                                         | No · Yes                                                                                                                                                                                                                                         | No · Yes                                                                                                                                                                                                                                         |
| (4) Tongue coating                            | No · Yes                                                                                                                                                                                                                                         | No · Yes                                                                                                                                                                                                                                         | No · Yes                                                                                                                                                                                                                                         | No · Yes                                                                                                                                                                                                                                         | No · Yes                                                                                                                                                                                                                                         | No · Yes                                                                                                                                                                                                                                         | No · Yes                                                                                                                                                                                                                                         |
| (5) Difficulty in opening mouth               | No · Yes                                                                                                                                                                                                                                         | No · Yes                                                                                                                                                                                                                                         | No · Yes                                                                                                                                                                                                                                         | No · Yes                                                                                                                                                                                                                                         | No · Yes                                                                                                                                                                                                                                         | No · Yes                                                                                                                                                                                                                                         | No · Yes                                                                                                                                                                                                                                         |
| (6) Ulcers                                    | No · Yes                                                                                                                                                                                                                                         | No · Yes                                                                                                                                                                                                                                         | No · Yes                                                                                                                                                                                                                                         | No · Yes                                                                                                                                                                                                                                         | No · Yes                                                                                                                                                                                                                                         | No · Yes                                                                                                                                                                                                                                         | No · Yes                                                                                                                                                                                                                                         |
| (7) Bleeding                                  | No · Yes                                                                                                                                                                                                                                         | No · Yes                                                                                                                                                                                                                                         | No · Yes                                                                                                                                                                                                                                         | No · Yes                                                                                                                                                                                                                                         | No · Yes                                                                                                                                                                                                                                         | No · Yes                                                                                                                                                                                                                                         | No · Yes                                                                                                                                                                                                                                         |
| Total points<br>(No; 0 points , Yes; 1 point) |                                                                                                                                                                                                                                                  |                                                                                                                                                                                                                                                  |                                                                                                                                                                                                                                                  |                                                                                                                                                                                                                                                  |                                                                                                                                                                                                                                                  |                                                                                                                                                                                                                                                  |                                                                                                                                                                                                                                                  |
| Care equipment used                           | <input type="checkbox"/> Sponge brush<br><input type="checkbox"/> Toothbrush<br><input type="checkbox"/> Tongue brush<br><input type="checkbox"/> Interdental brush<br><input type="checkbox"/> Moisturizer<br><input type="checkbox"/> Vaseline | <input type="checkbox"/> Sponge brush<br><input type="checkbox"/> Toothbrush<br><input type="checkbox"/> Tongue brush<br><input type="checkbox"/> Interdental brush<br><input type="checkbox"/> Moisturizer<br><input type="checkbox"/> Vaseline | <input type="checkbox"/> Sponge brush<br><input type="checkbox"/> Toothbrush<br><input type="checkbox"/> Tongue brush<br><input type="checkbox"/> Interdental brush<br><input type="checkbox"/> Moisturizer<br><input type="checkbox"/> Vaseline | <input type="checkbox"/> Sponge brush<br><input type="checkbox"/> Toothbrush<br><input type="checkbox"/> Tongue brush<br><input type="checkbox"/> Interdental brush<br><input type="checkbox"/> Moisturizer<br><input type="checkbox"/> Vaseline | <input type="checkbox"/> Sponge brush<br><input type="checkbox"/> Toothbrush<br><input type="checkbox"/> Tongue brush<br><input type="checkbox"/> Interdental brush<br><input type="checkbox"/> Moisturizer<br><input type="checkbox"/> Vaseline | <input type="checkbox"/> Sponge brush<br><input type="checkbox"/> Toothbrush<br><input type="checkbox"/> Tongue brush<br><input type="checkbox"/> Interdental brush<br><input type="checkbox"/> Moisturizer<br><input type="checkbox"/> Vaseline | <input type="checkbox"/> Sponge brush<br><input type="checkbox"/> Toothbrush<br><input type="checkbox"/> Tongue brush<br><input type="checkbox"/> Interdental brush<br><input type="checkbox"/> Moisturizer<br><input type="checkbox"/> Vaseline |
| Free Comment                                  |                                                                                                                                                                                                                                                  |                                                                                                                                                                                                                                                  |                                                                                                                                                                                                                                                  |                                                                                                                                                                                                                                                  |                                                                                                                                                                                                                                                  |                                                                                                                                                                                                                                                  |                                                                                                                                                                                                                                                  |
| Pattern*                                      | A, B, C, D                                                                                                                                                                                                                                       | A, B, C, D                                                                                                                                                                                                                                       | A, B, C, D                                                                                                                                                                                                                                       | A, B, C, D                                                                                                                                                                                                                                       | A, B, C, D                                                                                                                                                                                                                                       | A, B, C, D                                                                                                                                                                                                                                       | A, B, C, D                                                                                                                                                                                                                                       |
| Nurse sign / care time                        | /                                                                                                                                                                                                                                                | /                                                                                                                                                                                                                                                | /                                                                                                                                                                                                                                                | /                                                                                                                                                                                                                                                | /                                                                                                                                                                                                                                                | /                                                                                                                                                                                                                                                | /                                                                                                                                                                                                                                                |
| Dental hygienist sign / care time             | /                                                                                                                                                                                                                                                | /                                                                                                                                                                                                                                                | /                                                                                                                                                                                                                                                | /                                                                                                                                                                                                                                                | /                                                                                                                                                                                                                                                | /                                                                                                                                                                                                                                                | /                                                                                                                                                                                                                                                |

\*Pattern classification of oral contamination

| Oral mucosa                                         | Phlegm (+), Pharyngeal suction (+) |             | Phlegm (-), Pharyngeal suction (-) |               |
|-----------------------------------------------------|------------------------------------|-------------|------------------------------------|---------------|
|                                                     | dryness                            | viscosity   | dryness                            | normal        |
| Pattern                                             | A                                  | B           | C                                  | D             |
| Number of oral care per day for parenteral patients | 2-3 times/day                      | 2 times/day | 1-2 times/day                      | 1-2 times/day |
